# Supplementary material for: Effects of proline substitution/inclusion on the nanostructure of a self-assembling β-sheet-forming peptide
Source: Royal Society of Chemistry journal article supplement (doi:10.1039/d4ra07065h), 2024-01-01
Supplement: d4ra07065h1.pdf [file d4ra07065h1.pdf]

ESI updated 29<sup>th</sup> Nov 2024, authors institutions are now represented correctly

## **Effects of Proline Substitution/Inclusion on the Nanostructure of Self-assembling $\beta$ -Sheet Forming Peptide – Supporting Information**

Jacek K. Wychowaniec<sup>a,b,\*</sup>, Martin Šrejber<sup>c</sup>, Niting Zeng<sup>a</sup>, Andrew M. Smith<sup>a</sup>, Aline F. Miller<sup>d</sup>, Michal Otyepka<sup>c,e</sup>, Alberto Saiani<sup>f,\*</sup>

<sup>a</sup> Department of Materials & Manchester Institute of Biotechnology, School of Natural Sciences, Faculty of Science and Engineering, The University of Manchester, UK

<sup>b</sup> AO Research Institute Davos, Clavadelerstrasse 8, 7270, Davos, Switzerland. E-mail: [jacek.wychowaniec@aofoundation.org](mailto:jacek.wychowaniec@aofoundation.org)

<sup>c</sup> Regional Centre of Advanced Technologies and Materials, Czech Advanced Technology and Research Institute (CATRIN), Palacký University Olomouc, 779 00 Olomouc, Czech Republic

<sup>d</sup> Department of Chemical Engineering & Manchester Institute of Biotechnology, School of Engineering, Faculty of Science and Engineering, The University of Manchester, UK

<sup>e</sup> IT4Innovations, VSB-Technical University of Ostrava, 708 00 Ostrava-Poruba, Czech Republic

<sup>f</sup> Division of Pharmacy and Optometry & Manchester Institute of Biotechnology, School of Health Sciences, Faculty of Biology, Medicine and Health, The University of Manchester, UK. E-mail: [a.saiani@manchester.ac.uk](mailto:a.saiani@manchester.ac.uk)

**Table S1.** Detailed information of performed molecular dynamics simulations.

|                      |                  | <i>Number of peptides</i> | <i>Number of H<sub>2</sub>O molecules</i> | <i>Simulation box size [nm]</i> | <i>Simulation length [ns]</i> |
|----------------------|------------------|---------------------------|-------------------------------------------|---------------------------------|-------------------------------|
| <i>pre-assembled</i> | F8 single ladder | 6                         | 9347                                      | 7.6 × 6.7 × 5.7                 | 500                           |
|                      | F8 double ladder | 12                        | 11521                                     | 7.8 × 6.7 × 6.9                 | 500                           |
|                      | FP single ladder | 6                         | 12628                                     | 8.3 × 7.4 × 6.4                 | 100                           |
| <i>self-assembly</i> | KPE              | 50                        | 30002                                     | 10 × 10 × 10                    | 100                           |
|                      | EPK              | 50                        | 29957                                     | 10 × 10 × 10                    | 100                           |

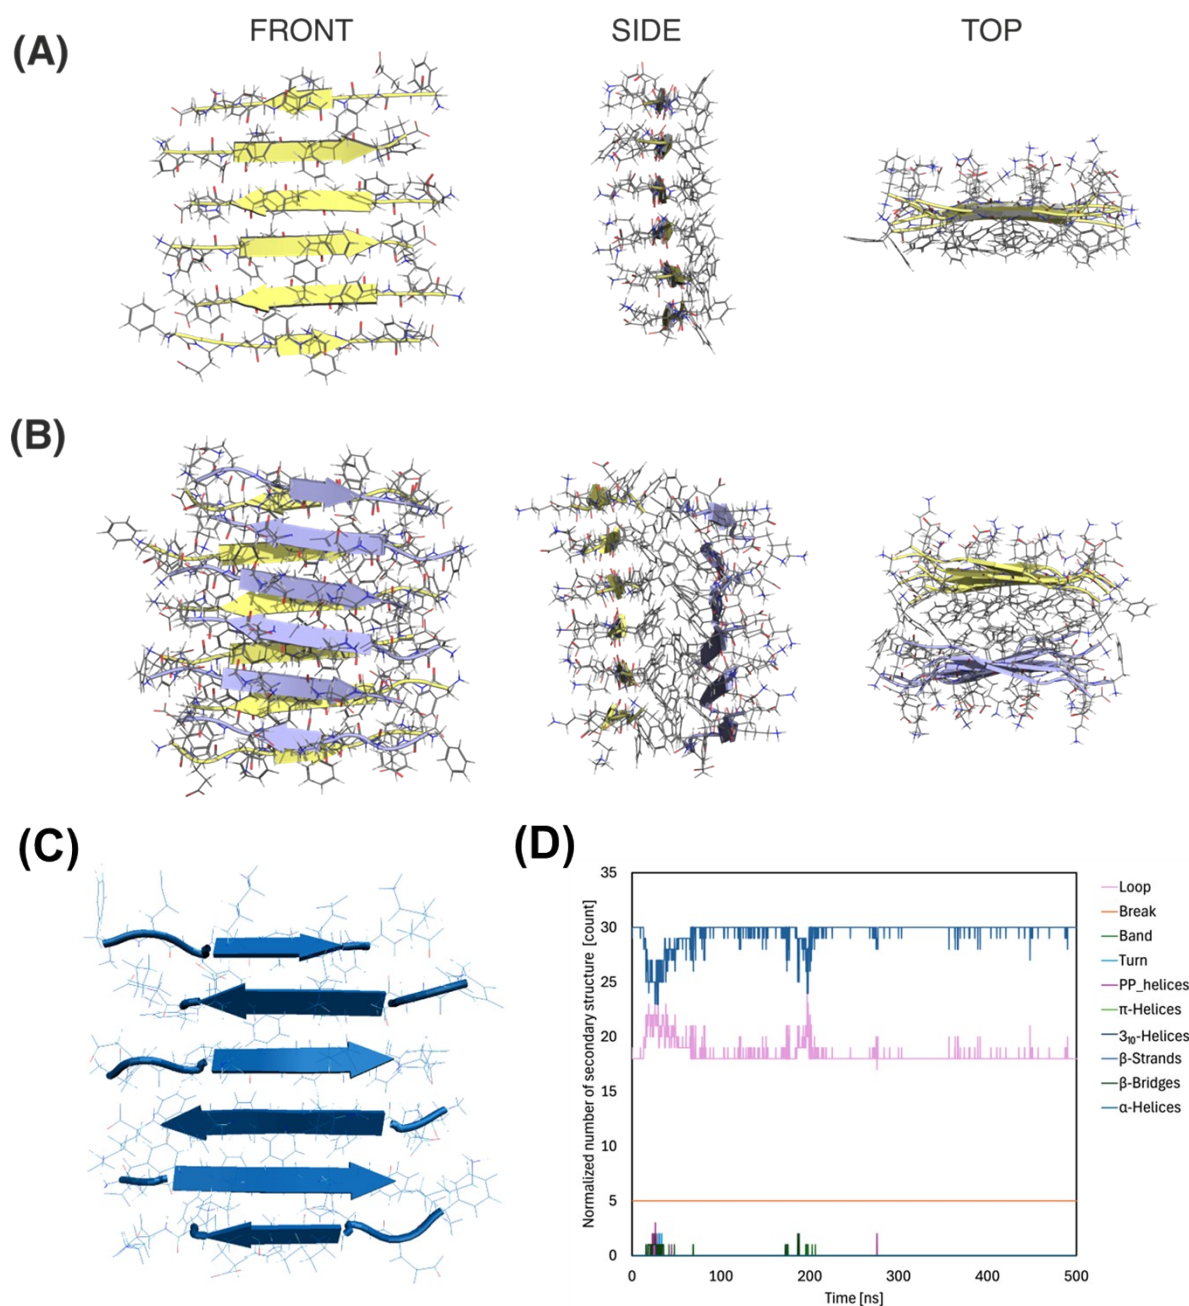

**Figure S1.** Final structures of F8 peptides (front, side, and top view) pre-assembled in single ladder (A) and double ladder (B). (C) Final snapshot of structure of F8 parental peptide sequence and (D) normalized secondary structural motifs as a function of time depicting a clear propensity of pre-assembled ladder conformation to form antiparallel stacking model.

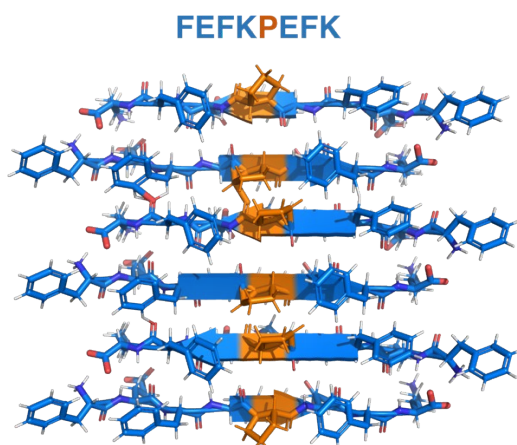

**Figure S2.** The initial structure of FP variant constructed as single amino acid replacement of phenylalanine to proline in the form of  $\beta$ -sheet ladder from parental F8 peptide.

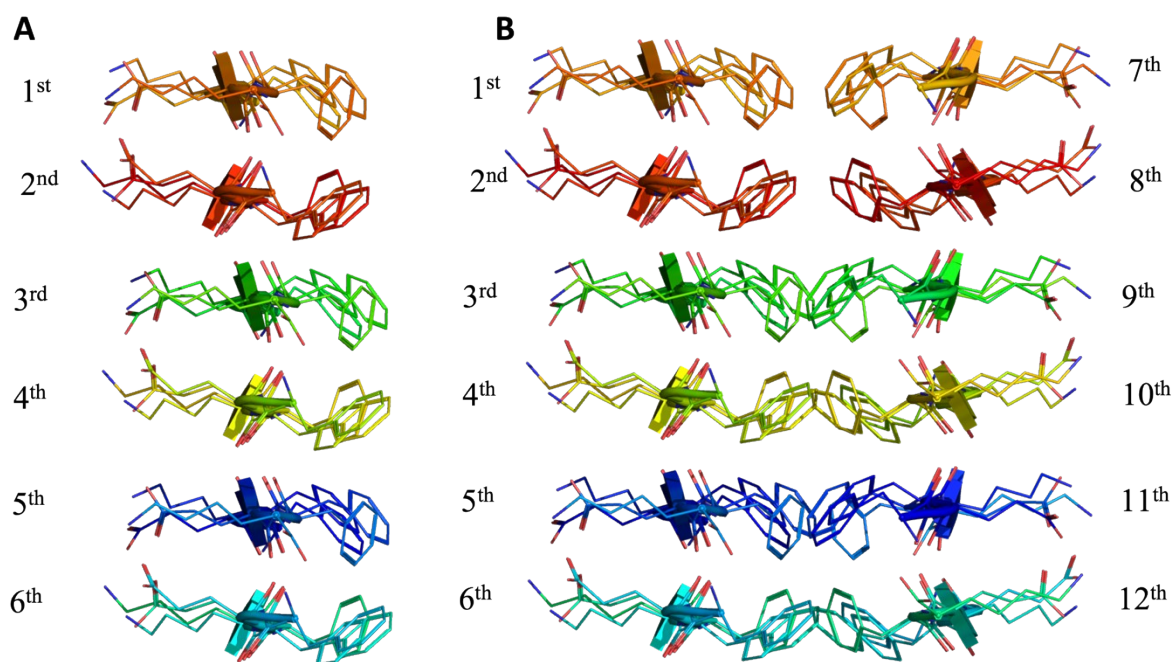

**Figure S3.** Numbering of single ladder (A) and double ladder (B) forms of F8 variant.

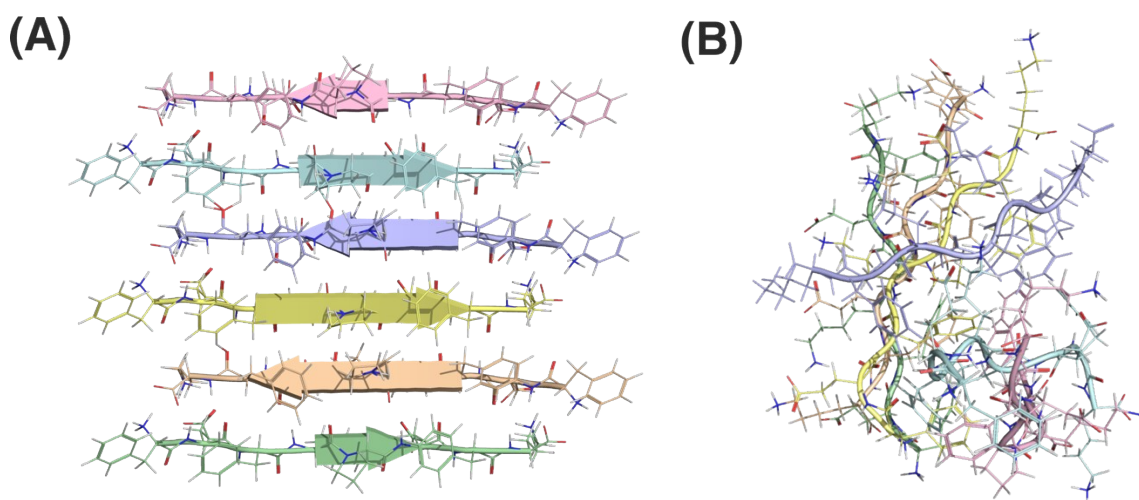

**Figure S4.** The starting structure **(A)** and final snapshot **(B)** of FP variant after 100 ns.

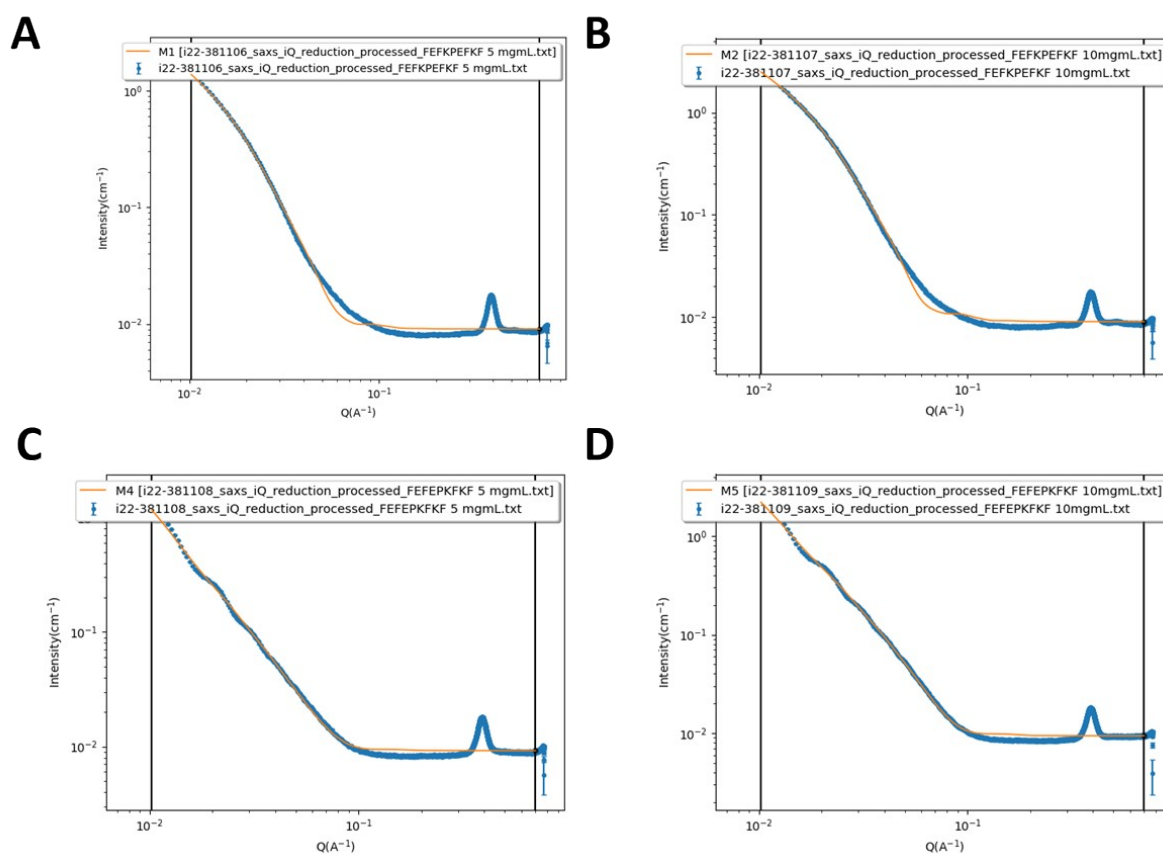

**Figure S5.** SasView fittings of SAXS patterns obtained for: **(A)** 5 mg mL<sup>-1</sup> KPE, **(B)** 10 mg mL<sup>-1</sup> KPE, **(C)** 5 mg mL<sup>-1</sup> EPK, **(D)** 10 mg mL<sup>-1</sup> EPK. Orange lines show the elliptical cylinder fitting and blue lines depict original data.
